# The case for species selection

2

Carl Simpson<sup>1</sup>

4

<sup>1</sup>Department of Paleobiology, National Museum of Natural History, Smithsonian Institution,  
6 Washington, D.C. 20013-7012, USA

8 email: [carlsimpson.macro@gmail.com](mailto:carlsimpson.macro@gmail.com)

Keywords: Macroevolution, punctuated equilibrium, microevolution, species selection, species  
10 sorting

12 Part one of a two part series

14 **Abstract** The mere existence of speciation and extinction make macroevolutionary processes  
possible. Speciation and extinction introduce discontinuities in the microevolutionary change  
16 within lineages by initiating, disrupting, and terminating the continuity of species lineages.  
Within a clade, speciation and extinction become potent means of macroevolution in and of  
18 themselves. This process, termed species selection, is a macroevolutionary analogue of natural  
selection, with species playing an analogous part akin to that played by organisms in microevo-  
20 lution. Regardless, it has proven difficult to think about levels of selection. The concept of  
species sorting was introduced to help our thinking on this issue by identifying two sources  
22 of uncertainty: uncertainty in the level that selection acts and uncertainty about if the pattern  
of selection is in fact caused at all. Thanks to insights from evolutionary transitions in indi-  
24 duality, we now know more about how to identify the level of selection and how to parse  
the causal structure in hierarchical evolutionary circumstances. We know that if the fitness of  
26 organisms causes the fitness of more inclusive species then they must covary. However, there  
is no evidence of such a covariance between fitness. This covariance is just not observed; nei-  
28 ther between cells and organisms nor between organisms and species. Rather, speciation and  
extinction rates appear to be completely divorced from organismal fitness. With this insight,  
30 the concept of sorting only covers the two processes of selection and drift. I argue that we are  
better off focusing on understanding the processes of species selection and drift and that there  
32 is therefore no further need for the concept of species sorting.

## How are trends produced?

34 Macroeolution as a field of study, took shape in the 1970s because of punctuated equilibrium.  
35 Punctuated equilibrium (Eldredge and Gould 1972) helped us to look at the fossil record at a  
36 slightly different angle than we did previously, and with this new look, familiar patterns took  
37 on new meaning and novel phenomena became obvious possibilities. Of all the aspects of  
38 macroevolution, it was large-scale trends that benefited the most from punctuated equilibrium.

For decades before punctuated equilibrium, trends were not well understood. There were too  
40 many patterns to make sense of and there was no conceptual framework. Looking back, it seems  
41 like there was close to a one-to-one relationship between patterns and processes, for example  
42 “orthogenesi” the pattern and “orthoevolution” the theory, where every particular pattern was  
43 thought to be underpinned by a general process that produced it. The “law” of morphological  
44 evolution, for example Cope’s rule, Williston’s law (Gregory 1935), etc. are all of this time. G.  
45 G. Simpson (1944, 1953) succeeded in breaking this myopic view of trends by recognizing their  
46 statistical nature inherent in the bushy proliferation of species. His key insight was that patterns  
47 can vary over time and phylogeny without the need for a separate processes to explain all the  
48 variation. A single large-scale process could give rise to inconsistent smaller-scale patterns as  
49 different branches of a clade evolve independently and yet, still produce an overall trend.

50 Punctuated equilibrium further distilled Simpson’s statistical view of trends by identifying  
51 a single process that is flexible enough to produce most types of trends. Stanley’s (1975, 1979)  
52 idea of species selection is this type of process. It was first recognized because punctuated  
53 equilibrium suppresses any tendency for microevolution to underpin trends. The logic goes  
54 like this: if incessant microevolution did not in fact lead to sustained change within species  
55 (there is stasis instead), then there must be some more inclusive process that could shepherd  
56 populations of species and cause a trend. The shepherding process of species selection that  
57 Stanley identified maybe sufficient to produce many of the examples of trends we know from  
58 the fossil record because it can act in many directions and magnitudes. Species selection can act  
59 to produce trends when morphological stasis within species is common. It can move populations  
60 of species if there is no inherent bias in the phenotypic direction of speciation. It can even act  
61 when species evolve gradually and speciate directionally (McShea 2004, Simpson 2010b).

62 For Stanley, natural selection at the organismal level is more than a metaphor for species  
63 selection. For him the two levels of selection are isomorphic and species selection is as real a  
64 phenomenon as natural selection is. Selection among organisms and selection among species  
65 are essentially the same process, but they occur at hierarchically separate levels of organization.  
66 Populations of variable organisms, with the addition of natural selection, will show evolutionary  
67 change. And in just the same way, but with different players, populations of variable species  
68 with the addition of species selection results in macroevolutionary trends.

Not everyone has embraced species selection (e.g., Coyne and Orr 2004, Williams 1992).  
70 There are two hurdles to the acceptance of species selection, one philosophical and the other  
71 practical.

72 Many are philosophically opposed to the idea of species selection because of their belief

that an understanding of all features of life and the physical world comes only by reducing everything to their lowest constituent parts. Although reductionism has been a powerful scientific tool, it is not the only one (Deutsch 2013). To me, this philosophical hurdle is easily passed without delving into philosophical argument, but rather can be shown to be false by using only paleobiological observations. Species selection has been empirically demonstrated in an increasing number of studies (e.g., Simpson and Harnik 2009; Goldberg et al. 2010; Mayrose et al. 2011; Powell and MacGregor 2011; Rabosky and McCune 2010; Simpson 2010, 2013). The irreducibility of speciation and extinction require us to reject a reductionist interpretation of these results.

The practical hurdle is more difficult, but it is also possible to pass. As scientists, we want to be certain that we can positively recognize species selection when it occurs and not be fooled some other phenomenon that can mimic it. A major step toward this goal came with the conceptual distinction between sorting and selection (Vrba and Gould 1986). Sorting's utility came from its recognition of two sources of uncertainty; the uncertainty about the level at which selection acts in any given situation, and the uncertainty about the causes of selective patterns. At the time of Vrba and Gould's paper, both uncertainties were rampant. Sorting provided a way to think and discuss macroevolutionary patterns without devolving into an argument about the causes of those patterns before we had the tools to test those arguments. This was a big advantage at the time because few macroevolutionary patterns had been well documented. Sorting has traditionally lumped both sources of uncertainty together—any uncertainty about the level of selection or if differential diversification is caused or uncaused would classify a pattern as sorting.

My goal with this paper is to re-evaluate species sorting in light of current concepts, methods, and empirical results. I will argue that, we can be much more certain about the levels at which selection acts because of what we have learned about macroevolution over the last 30 years. For example, the demonstrable irreducibility of speciation and extinction shows that an emergent fitness view of levels of selection is correct. This means that any pattern of differential diversification is due to processes acting at the same level as diversification and not as a byproduct of selection at lower levels.

The concept of sorting also encompasses uncertainty in the type of causation of differential diversification, it recognizes differential diversification as an interesting pattern and does not distinguish between a caused selective pattern and a chance stochastic pattern. I think this source of uncertainty is conceptually simpler to understand if we do away with the concept of sorting and instead contrast the two macroevolutionary processes that underpin it: caused selection with non-caused drift. Drift in macroevolution, as it is within organismal populations, is an ephemeral and chance pattern of fitness that induces directional proliferation.

The gain by including species selection in our conceptual arsenal of macroevolution is at least as great as the ones that Simpson and punctuated equilibrium brought to trends. We evaluate if species selection is real or not, as well as its relative frequency and importance in structuring macroevolutionary patterns, including patterns that I call non-trends, those patterns of major large-scale stability because of complex underlying dynamics where species selection and mi-

114 croevolution interact. One example of a non-trend is the stable frequency of coloniality and  
115 photosymbiosis in scleractinian corals (Simpson 2013). In this case, species selection and mi-  
116 croevolutionary trait change act in concert to constrain the relative frequency of coloniality and  
photosymbiosis over 200 million years. Non-trends are phenomena that can only be recognized  
118 by studying species selection.

## Irreducible macroevolution

120 There are two known phenomena that are common in macroevolution but that are absent from  
microevolution—speciation and extinction. If speciation and extinction were absent, evolu-  
122 tionary patterns that take place over macroevolutionary time-scales would not be very different  
from the expectation of current neontological theory. In this counterfactual world, large-scale  
124 patterns would all be uniformitarian and result from the accumulation of the microevolutionary  
processes that we can observe directly today. But speciation and extinction actually happen.  
126 And as a consequence, the new dynamics characteristic of macroevolution become apparent.  
The macroevolutionary patterns we actually observe are not simply the accumulation of mi-  
128 croevolutionary change because speciation and extinction introduce a threshold between micro-  
and macroevolution. This threshold arises because macroevolution occurs by changes within a  
130 *population of species*.

With every speciation event, a new independently evolving lineage is added. And with every  
132 extinction a species is removed. This may sound trivial, but these events are important because  
they have the ability to dominate the evolution within a population of species. Adding and  
134 subtracting species can change the distribution of traits in a population of species faster and in  
more ways than changes can be made with fixed species numbers.

## 136 Speciation

Let's look at speciation first. Speciation is the splitting of one or a set of interconnected popula-  
138 tions into independently evolving populations. Speciation frees new species from demographic  
and genetic connections to other species, and allows the new species to follow their own path  
140 and evolve independently. This independence of mode among species directly affects all pat-  
terns of macroevolution that happen within whole populations of species. Independence makes  
142 it more difficult to explain large scale pattern as the cumulative effect of patterns happening  
within species.

144 Consider a hypothetical example, a single species of rabbit is evolving ever longer ears  
over time. After a million years, this rabbit species branches off a descendent species and both  
146 ancestor and descendent species coexist after the speciation event. The descendent, which is  
free to evolve independently from its ancestor, evolves shorter and shorter ears over time as  
148 its ancestor continues on its trajectory toward long ears length. The average ear length in the  
population of rabbit species will at first be a function only of the ancestral species and later, after

150 speciation, the average ear length is a function of the two coexisting species (Fig. 1). In this  
152 example with the ear length of one species increasing and the other decreasing, the average does  
not change much after the speciation event as the net difference between both species increases  
as they diverge from each other in length.

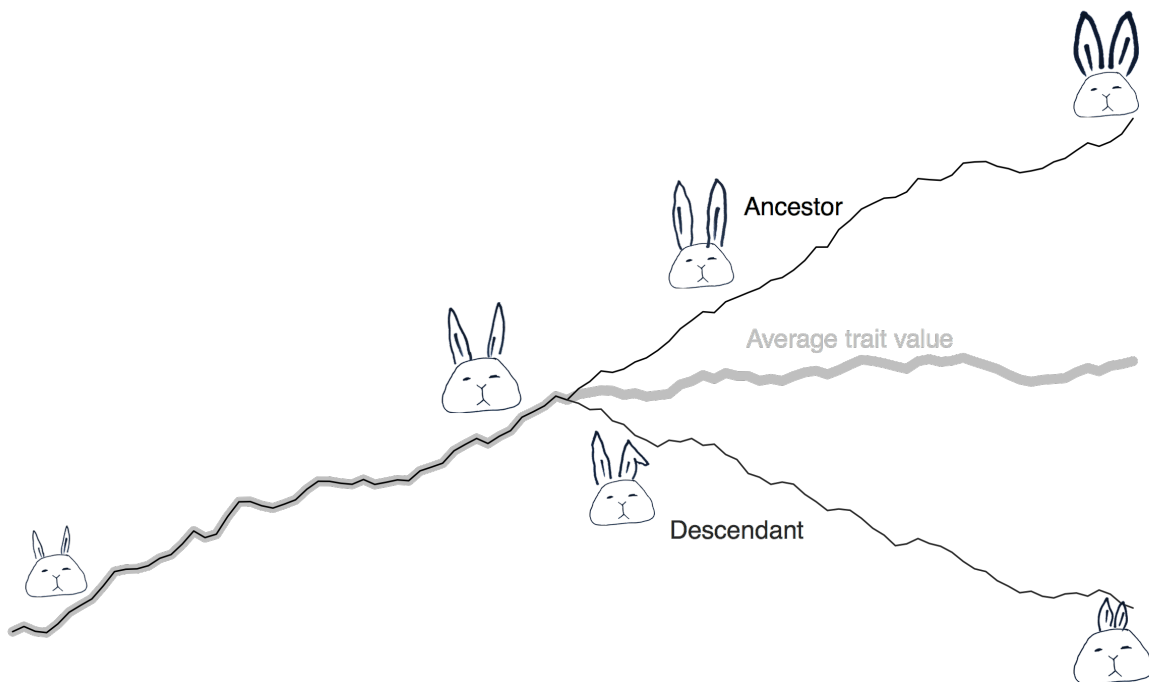

Figure 1: A cartoon of an anagenetically evolving rabbit species and its independently evolving daughter. The vertical axis shows rabbit ear length' and time is shown on the horizontal axis and moves from left to right. The graph depicts the mean ear length of the population of species. When there is only one species, the mean ear length exactly tracks the single ancestral species until speciation. After speciation the mean incorporates the sizes of both independently evolving species. The more independent species there are in a population, the less the evolution of any one species contributes to changes in the overall mean among species. The lesson here is that for anagenesis to play a major part in a macroevolutionary trend, a significant proportion of the species within the population must show similar patterns of morphological change overtime—which is difficult when they are all evolving independently. This issue occurs in this simple two-species example, but it gets ever more difficult to overcome as the species within a population become more numerous

154 Macroevolutionary trends are patterns that occur in populations of species, so any variation  
156 in evolutionary trajectory among species could easily cancel out the evolutionary change of  
others as the ancestor and descendent species of rabbits did to each other in the example. The

158 more species are involved the stronger this averaging effect becomes. Only in a clade of one, is  
there is no averaging effect and only in this extremely rare case is the evolution of a species the  
same as the evolution of a clade.

## 160 **The causes of speciation rates**

162 With each new species that evolves, not only is there the potential for the new species evolve  
independently from all the others. But there is also the potential for the rate of speciation to  
change with its introduction. Any variation in speciation rates within the species in a population  
164 has the potential to induce a trend.

Differential speciation (and extinction) constitute the raw material for species selection and  
166 sorting. Traits associated with species with relatively high speciation rates will increase in  
frequency over time. Simultaneously, traits associated with species that have relatively lower  
168 speciation rates will decrease in frequency. The pattern of covariation between rate variation  
and trait variation determines how the relative frequency of traits will change over time (Arnold  
170 and Fristrup 1982, Simpson 2010b, 2013, Simpson and Mller 2012), just as the covariance  
between fitness and trait variation among organisms determines how trait values will change by  
172 natural selection (Lande and Arnold 1983, Price 1970, Price 1972, Rice 2004).

Differential speciation can change the frequencies of any type of trait that it covaries with.  
174 It does not matter if the trait is emergent and inexpressible by single organisms, like geographic  
range size, or if the traits are attributes of individual organisms, like ear length. As long as there  
176 is a covariance between speciation rates and trait values, there will be a macroevolutionary  
change.

178 This ability for differential speciation to shepherd all types of traits, from organismal to  
emergent, has caused a lot of conceptual problems. Some researchers have restricted species se-  
180 lection only to the case where differential diversification directly covaries with emergent traits.  
Otherwise there is no way to tell if natural selection among organisms is the actual cause of  
182 the differential speciation. Vrba's effect hypothesis (Vrba 1980, Vrba 1983) encapsulates this  
view, and states that any covariation between differential speciation and organismal traits must  
184 be caused by the effects of organismal-level natural selection percolating upward to the level  
of speciation. Restricting species selection to act only on emergent traits is thought by some to  
186 eliminate the possibility of confusing it with the effect hypothesis.

However there is a different school of thought that focuses on emergent fitness rather than  
188 emergent traits. This view recognizes a broader set of patterns as indicating species selection  
(Jablonski 2008). For this school, differential speciation is emergent fitness. For them it is  
190 important to note that the cause of differential speciation will always be at the species level.  
Traits at any level can covary with speciation rates and macroevolve, but organismal level traits  
192 do so by hitchhiking with a covarying intermediary trait.

Which of the two alternative conceptual frameworks, emergent traits or emergent fitness, is  
194 biologically most realistic? To test between these differences we need to know how differential  
speciation relates to differential organismal fitness. I see two mutually exclusive possibilities.



196 First, differential speciation could be reducible to differential organismal fitness so that high  
speciation rates would be caused by high organismal fitness. Alternatively, organismal fitness  
198 and differential speciation could be independent features of life. In this case, the two things  
are hierarchically nested, within species, the constituent organisms have their fitnesses, while  
200 at the same time species have their speciation rates. The key to answering one way or the other  
is in identifying any link between the fitness of species (differential speciation rates) with the  
202 fitnesses of organisms within populations.

If there is a link between organismal fitness and speciation rates, then there will be a positive  
204 correlation between fitness and speciation rate. One way to identify such a correlation is to  
see if the temporal patterns of organismal fitness match the temporal patterns of speciation  
206 rates. If organismal fitness increases over time and these fitnesses are linked to speciation, then  
speciation rates should also increase over time.

208 It is not tractable to empirically measure organismal fitness over the lifetime of a species.  
Instead, we must turn to theoretical expectations on the temporal pattern of fitness (e.g., Orr  
210 2009). There has been long argument within the microevolutionary community about how  
fitness changes over time. Wright, claimed that average fitness always increases in proportion  
212 to the slope of the fitness landscape. As populations climb the hills of the fitness landscape,  
they follow the steepest slope. And even as the landscape changes over time, the population  
214 will always take the steepest path upslope, and therefore always increases over time. Fisher  
(Fisher 1930) argued that there is more to the change in fitness than the slope of the fitness  
216 landscape. He argues that the rate of fitness increase is also proportional to the additive genetic  
variance, a pattern known as Fisher's fundamental theorem. This means that traits with more  
218 variation will evolve faster than those with less variation. This structure of the genetic variance  
combines with the slope of the fitness landscape to determine the rate of fitness increase. In  
220 Fisher's case variances are always zero or positive, so it converges with Wright's view that the  
first order long-term expectation of fitness change is that it will increase over time, although how  
222 quickly the population climbs is modulated by both the variance in Fisher's view and modulated  
by the change in the fitness landscape in Wright's view.

224 Since Fisher's time we have developed more theory detailing the importance of the specific  
structure of genetic variation. Certain genetic interactions like epistasis and linkage disequi-  
226 librium, as well as population interactions like frequency dependence, can lead to a temporary  
decline in fitness. Even if these declines in fitness occur in specific genotypes within the species'  
228 population, the mean fitness of all members of a species will likely increase as genotypes re-  
place each other successionaly over time. So the long-term trajectory of organismal fitness  
230 should follow Fisher's and Wright's expectations.

If speciation rate is linked to organismal fitness by upward causation (as expected given the  
232 effect hypothesis) it too should increase over the lifetime of the species. The easiest way to  
empirically measure this temporal pattern in speciation rate would be to tally the frequencies  
234 of speciation events over a species' lifetime. Although this has rarely been done, two  
recent studies have looked into the relative timing of speciation in the fossil record (Liow and  
236 Ergon 2015) and with molecular phylogenetics (Hagen et al. 2015). With the few examples



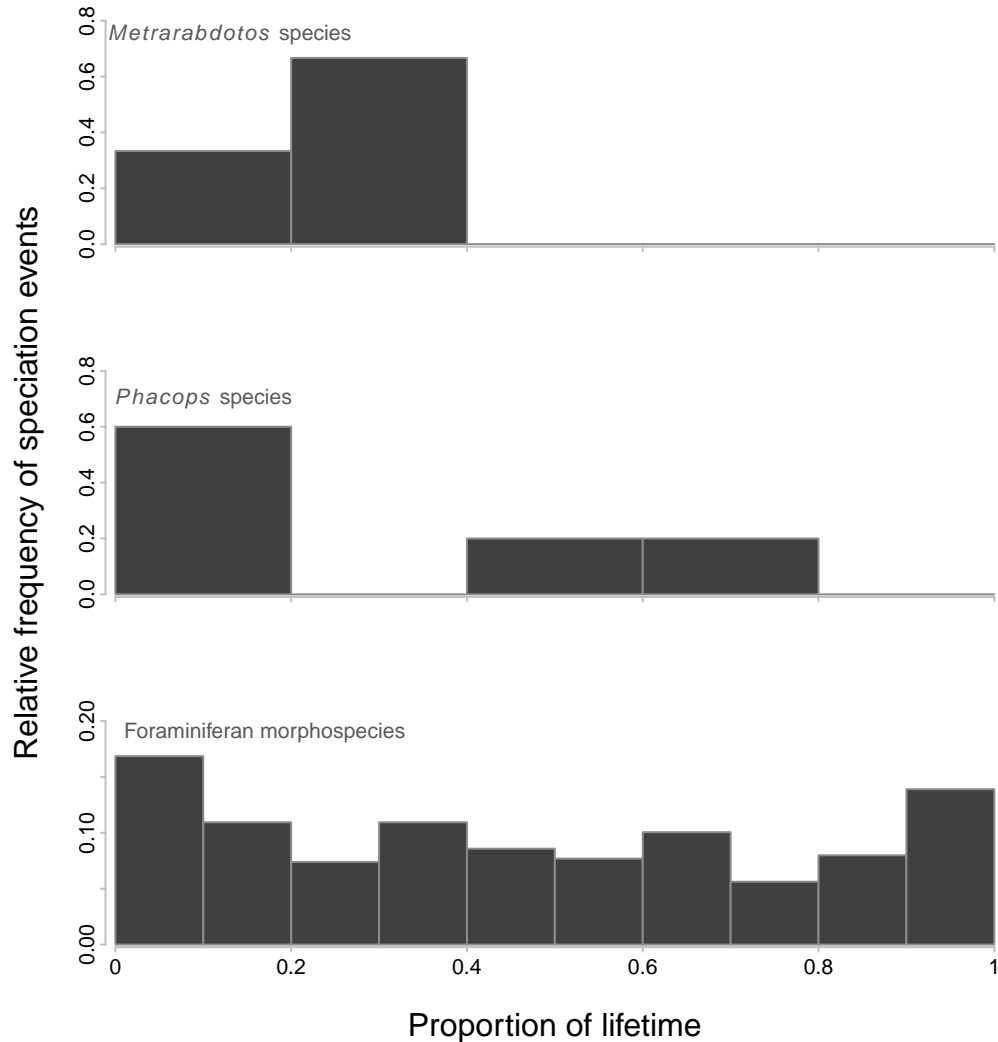

Figure 2: A tabulation of the relative frequency of speciation events during the relative age (lifetime) of ancestors. The three groups of fossils shown here have are based on phylogenies with explicit ancestor-descendent relationships defined. The top panel shows the relative frequency of the timing of speciation events within the cheilostome bryozoan *Metrarabdotos* (Cheetham et al. 2007). The middle panel shows the relative frequency of the timing of speciation in the trilobite *Phacops* (Eldredge 1972). The bottom panel shows the relative frequency of the timing of speciation for species of macroperforate planktonic foraminifera (Aze et al. 2011).

238 of species-level phylogenies including explicit ancestors available in the fossil record Liow and Ergon (2015) fit models of age-dependent speciation (including the frequency of speciation

given a temporal duration) and identify several different patterns of age-dependence. In some  
240 groups biased toward the early part of the ancestor's lifetime, and others they find that long-lived  
species have higher speciation rates. Using molecular phylogenies of extant species, Hagen et  
242 al. (2015) found that the frequency of speciation is ubiquitously biased toward the beginning of  
an ancestor's lifetime—a result counter to the expectation of a link between organismal fitness  
244 and speciation rates.

Here are a few additional examples that are useful in identifying how the pattern of speci-  
246 ation over the lifetime of ancestral species can vary. One example, planktonic macroporiferate  
foraminiferans (Aze et al. 2011) show a uniform patterning of speciation along the lifetime of  
248 ancestors (Fig. 2)—speciation is as likely to occur early in an ancestor's lifetime as it is toward  
the end (similar to the pattern Liow and Ergon 2015 found). The phylogeny links ancestor-  
250 descendant pairs of morphospecies together and records the timing of first and last appearance of  
each morphospecies in the geological record. Here, I measured when, relative to the ancestor's  
252 lifetime, speciation occurred. The timing of speciation in the cheilostome bryozoan *Metrarab-*  
*dotos* (Cheetham 1986, Cheetham et al. 2007) provides a second example. In *Metrorabdotos*  
254 the timing of speciation is clustered in the first half of species lifetimes (Fig. 2). This result  
is different than the old-age dependent speciation Liow and Ergon find for *Metrarabdotos*, be-  
256 cause they identify a tendency for longer-lived species to have more descendants independent  
of when those descendant species were budded off. Lastly, speciation in the trilobite genus  
258 *Phacops* (Eldredge 1971, 1972) is clustered early in the lifetime of ancestors (Fig. 2).

These three examples, as well as the patterns seen in Liow and Ergon (2015) and Hagen et al  
260 (2015) reject the possibility that speciation is reducible to organismal fitness. Like cell-division  
and sexual reproduction, organismal fitness and speciation are independent processes that occur  
262 together in a hierarchically nested arrangement of organisms within species. The two levels of  
fitness may interact, but they are independent, and caused independently.

## 264 **The causes of extinction**

Compared to the irreducibility of speciation, extinction seems, at first glance, to be easily re-  
266 ducible. After all, a species of must be extinct if all its constituent organisms are dead. Nev-  
ertheless, this line of thought leads to the false conclusion that species go extinct due to the  
268 same causes from which organisms die. In the end our conclusions about the reducibility of  
extinction should focus on distinguishing its causes compared to those that cause organismal  
270 fitness.

The causal link between death and extinction is tenuous. Organisms die from the numerous  
272 things that can kill them; it could be predation, disease, starvation, accident, the weather, fights,  
or old age that does the deed for any particular organism. The cause of death will always  
274 vary from organism to organism within a population. The net effect of all this death is that  
the population may shrink if the birth rate is not sufficiently high to replace the numbers that  
276 are killed. Population decline maybe a common cause of the extinction, but organisms never

278 die from population decline, and population decline is never caused by organismal death alone  
because birth rate plays a major role in population growth. It's the relative balance between  
280 birth, death, and lifespan of organisms that determines population growth rate and consequently  
extinction.

Moreover, extinction can be guaranteed for a species prior to the collapse of its populations,  
282 as is the case when populations are below a minimum viable population size. In this situation  
extinction is caused by the population crossing a threshold of viability. Organisms within the  
284 population do not, however, die from being a part of an inviable population. Instead, they  
succumb for any number of more mundane reasons. The Pinta Island tortoises went extinction  
286 for a very different reason than the heart failure that killed Lonesome George.

There can be a positive correlation between organismal fitness and population growth rates.  
288 This correlation, termed the Allee effect, is particularly important in frequency dependent and  
limited populations. The existence of this effect is likely an example of downward causation,  
290 where the fitness of organisms are influence by their population context.

Two paleobiological patterns suggest other causes of extinction that don't percolate up from  
292 organismal fitness. The first, termed Van Valen's law (or the law of constant extinction) is a  
characteristic pattern of extinction that emerges among genera or families within a higher taxon  
294 (Raup 1975, Van Valen 1973). Van Valen identified a distinctive log-linear pattern in the age-  
frequency distributions of the majority of fossil higher taxa. The log-linearity in this distribution  
296 means that, within a higher taxon, genera (or families) of all ages share the same probability of  
extinction. A long lifetime does nothing to buffer genera or families from extinction. Van Valen  
298 was quite surprised with this result because natural selection among organisms is expected to  
increase their fitness (and consequently their adaptedness) over time as their populations evolve.  
300 If true, Van Valen's law shows that extinction is decoupled from the patterns of organismal  
fitness. Van Valen proposed the Red Queen's Hypothesis to give a possible mechanism for this  
302 decoupling by invoking the importance of competitive interactions among species, genera, or  
families within an adaptive zone. The biotic environment is so shifty and complex that even  
304 ever increasing fitness within a species does not necessarily increase higher fitness relative to  
other competing species.

306 The second paleobiological pattern is the symmetric rise and fall of species and genera  
(Foote 2007, Foote et al. 2007, Jernvall and Fortelius 2004, Liow et al. 2010, Liow and Stenseth  
308 2007). On average, the occupancy or range size of species rises from a low initial value to a  
peak halfway through the lifetime and subsequently falls until extinction occurs. As with the  
310 age-independence of extinction, the rise-and-fall pattern cannot be explained by changes in  
organismal fitness because those are expected to increase over the lifetime of a species. The  
312 cause of the rise and fall pattern is not currently known. From interval to interval there is  
a correlation between the second order changes in occupancy and a change in environments  
314 (Foote 2014). But I think that this environmental cause is unlikely generalize to the first-order  
rise-and-fall pattern that plays out over lifetimes, because any time the environment changes in  
316 one direction, species of young and old ages are both affected. When species are lined up from  
birth to death, rather than from the time in the past they occur, the effect of any specific event

318 of environmental change that is experienced by young and old alike will be smeared across the  
lifetime and on average cancels out. As with the Red Queen, biotic interactions among species  
320 may be critical to understand the rise-and-fall pattern (Simpson 2010a).

As we have seen, extinction is a clearly emergent phenomenon. The features it has are not  
322 the same as the features of traits that are ambiguously emergent. Often in ambiguous cases,  
variability plays a part in the irreducibility of a phenomenon consisting of traits that are re-  
324 ducible. For example, body size is an organismal trait, yet because it is relatively invariant  
within a species, it can also behave similar to an emergent trait—the species has a characteristic  
326 body size that can be selective (Van Valen 1975). Extinction is emergent for the opposite reason  
and in spite of the variable causes of death of its constituents.

328 Differential extinction can change the frequencies of traits over time by culling species away.  
It can also act in conjunction with differential speciation through selective net diversification.  
330 Most of the patterns of selectivity that speciation can produce occurs inversely with extinction.  
Unlike speciation, extinction's power to create trends is immediate because the loss of species  
332 immediately culls the trait distribution.

## The many levels of selection

334 The philosophical issue that prevents the easy recognition of species selection hinges on a sus-  
picion that species selection is reducible to natural selection. Any confusion about the level at  
336 which selection acts in any given scenario would get in the way of a useful theory.

The concept of species sorting incorporates this uncertainty about the level of selection  
338 by being agnostic about the level that differential speciation and extinction rates are caused.  
It recognizes and highlights the pattern of differential diversification without concern about the  
340 level of selection that causes the pattern. But the fact that speciation and extinction are emergent  
removes this uncertainty about the level at which selection acts. Any pattern of differential  
342 speciation, extinction, and diversification are themselves emergent because these differentials  
are created by emergent patterns of speciation and extinction and not caused by organismal  
344 fitness. Speciation and extinction are the macroevolutionary analogues of birth and death in  
organismal fitness, and as such constitute an emergent species-level fitness. Organismal and  
346 species level fitnesses occur together in much the same way that zooid and colony level fitnesses  
both occur in colonial organisms (Simpson 2011, 2012). Fitness represents a demographic  
348 process at each level that it occurs. As a consequence, any trait that covaries with diversification  
rates has the potential to change by species selection.

350 This certainty in the level at which species selection acts—at the species level due to emer-  
gent and differential diversification—helps us make the next step and solve the practical prob-  
352 lem, which is how to recognize species selection when it occurs.

## Selection and drift—the caused and the uncaused

354 The concept of species sorting incorporates another source of uncertainty about differential  
diversification—uncertainty about how the rate differentials are caused. There are two ways to  
356 be uncertain about these causes. First, are the traits associated with the rate differential acting to  
directly cause the rates or are they a part of a chain of causation that links the traits we measure  
358 to diversification, essentially hitchhiking with some unmeasured intermediaries? And second,  
are the differential rate patterns caused at all or are they temporary random associations and  
360 therefore uncaused. Hitchhiking is likely to be extremely common in nature. Most species are  
likely to have a number of emergent traits and a significant number of organismal traits that  
362 covary with each other. Selection in a multivariate regime can be quite complex with characters  
evolving due to their interactions with each other and with fitness. Even if a trait is evolving  
364 only by hitchhiking through a covariation with the trait that is the target of selection, it can  
effect the outcome of the selective process. The resulting evolutionary change will deviate from  
366 the trajectory that would have occurred if the target of selection was able to vary independently  
with the hitchhiking trait. In other words, the structure of covariation between selection and  
368 many evolving traits is important in determining the response to selection (Lande and Arnold  
1983, Rice 2004). Chance associations between traits and fitness are also common in microevo-  
370 lution and known as drift. Drift mimics natural selection and it can easily lead to evolutionary  
changes in small populations, where common stochastic differences in fitness between organ-  
372 isms can take on a large effect. Drift is the same at the species level. With the emergent fitness  
approach, selection, whether direct or via hitchhiking, and drift are the only two processes en-  
374 compassed by species sorting. Selection and drift are real evolutionary processes but sorting is  
a conceptualization of our scientific knowledge. As such, sorting can be a useful tool to keep us  
376 asking the right questions and organizing our uncertainty. But only selection and drift are evo-  
lutionary processes. If we recognize both processes of selection and drift, then the concept of  
378 sorting becomes a redundant and imprecise conception of actual macroevolutionary processes.

## Conclusions

380 We know that life has hierarchical structure that has a physical manifestation and also an expres-  
sion in processes like fitness. The physical manifestation is simply cells within bodies, bodies  
382 within populations, populations within species, and species within populations of species. The  
expression of hierarchical structure in terms of fitness occurs because the parts and wholes  
384 contained in that list can be added by birth or speciation, subtracted by death or extinction, or  
expand in size by the births and death of constituent parts. The physical manifestations are  
386 what does the evolving where as the demographic changes expressed by fitness are involved in  
causing that evolution.

388 To understand how to distinguish between selection and drift as well as understand the  
causal structure that associates traits and fitness, we need to have a precise way to calculate  
390 patterns of selection and microevolution. I'll provide a framework to do this in a companion

paper (Simpson, Species selection on evolving characters). I think that this framework will  
392 help us to understand how all the processes that we know about interact with each other. With  
that knowledge, we can then focus in real-world situations and apply this macroevolutionary  
394 framework to understand what's going on. My hope is that this framework will give us a way to  
use mismatches between empirical observations and theoretical predictions as well as the other  
396 surprising results to enrich our knowledge of macroevolution. For too long, the field has used  
empirical observations as evidence for or against two fixed and opposing conceptual positions.  
398 With this framework I hope that empirical observations will be used to extend past these two  
conceptual positions develop and refine our understanding of macroevolution.

## 400 Acknowledgments

Thanks to Doug Erwin, Dan McShea, Chris Haufe, Sarah Tweedt, Rachel Warnock, and Jenna  
402 Rolle for discussion and comments. This paper was born from listening to Warren Allmon's  
questions to my talk during the Florida NAPC in 2014. I realized that certain parts of macroevo-  
404 lutionary theory have developed quickly over the years but that many of those ideas and argu-  
ments have not received enough attention in print. It's time to get them out of the shadows so  
406 we can see if they are worth developing further.

## References

- 408 Arnold, A. J., and K. Fristrup. 1982. The Theory of Evolution by Natural Selection: A  
Hierarchical Expansion. *Paleobiology* 8(2):113-129.
- 410 Aze, T., T. H. Ezard, A. Purvis, H. K. Coxall, D. R. Stewart, B. S. Wade, and P. N. Pearson.  
2011. A phylogeny of Cenozoic macroperforate planktonic foraminifera from fossil  
412 data. *Biological Reviews* 86(4):900-927.
- Cheetham, A. H. 1986. Tempo of evolution in a Neogene bryozoan: rates of morphologic  
414 change within and across species boundaries. *Paleobiology* 12(2):190-202.
- Cheetham, A. H., J. Sanner, and J. B. Jackson. 2007. *Metrarabdotos* and related genera (Bry-  
416 ozoa: Cheilostomata) in the late Paleogene and Neogene of Tropical America. *Journal*  
of Paleontology 81(sp67):1-91.
- 418 Coyne, J. A., and H. A. Orr. 2004. *Speciation*. Sinauer Associates Sunderland, MA.
- Deutsch, D. 2013. Constructor theory. *Synthese* 190(18):4331-4359.
- 420 Eldredge, N. 1972. Systematics and evolution of *Phacops rana* (Green, 1832) and *Phacops*  
*iowensis* Delo, 1935 (Trilobita) from the Middle Devonian of North America. *Bulletin*  
422 of the American Museum of Natural History 147(2).



- 424 Eldredge, N., and S. J. Gould. 1972. Punctuated equilibria: an alternative to phyletic gradualism. P. 115. In T. J. M. Schopf, ed. *Models in paleobiology*. Freeman, Cooper, San Francisco.
- 426 Fisher, R. A. 1930. *The genetical theory of natural selection*. Oxford University Press.
- 428 Foote, M. 2007. Symmetric waxing and waning of marine invertebrate genera. *Paleobiology* 33(4):517-529.
- 430 Foote, M. 2014. Environmental controls on geographic range size in marine animal genera. *Paleobiology* 40(3):440-458.
- 432 Foote, M., J. S. Crampton, A. G. Beu, B. A. Marshall, R. A. Cooper, P. A. Maxwell, and I. Matcham. 2007. Rise and fall of species occupancy in Cenozoic fossil mollusks. *Science* 318(5853):1131-1134.
- 434 Goldberg, E. E., J. R. Kohn, R. Lande, K. A. Robertson, S. A. Smith, and B. Igić. 2010. Species selection maintains self-incompatibility. *Science* 330(6003):493-495.
- 436 Gregory, W. K. 1935. Williston's law' relating to the evolution of skull bones in the vertebrates. *American Journal of Physical Anthropology* 20(2):123-152.
- 438 Hagen, O., K. Hartmann, M. Steel, and T. Stadler. 2015. Age-dependent speciation can explain the shape of empirical phylogenies. *Systematic Biology*:syv001.
- 440 Jablonski, D. 2008. Species selection: theory and data. *Annual review of ecology, evolution, and systematics* 39:501-524.
- 442 Jernvall, J., and M. Fortelius. 2004. Maintenance of trophic structure in fossil mammal communities: site occupancy and taxon resilience. *American Naturalist* 164(5):614-24.
- 444 Lande, R., and S. J. Arnold. 1983. The measurement of selection on correlated characters. *Evolution* 37(6):1210-1226.
- 446 Liow, L. H., and T. Ergon. 2015. Fitting Ancestral Age-Dependent Speciation Models to Fossil Data. Pp. 432-460. In W. D. Allmon, and M. M. Yacobucci, eds. *Species and Speciation in the Fossil Record*. University of Chicago Press.
- 450 Liow, L. H., H. J. Skaug, T. Ergon, and T. Schweder. 2010. Global occurrence trajectories of microfossils: environmental volatility and the rise and fall of individual species. *Paleobiology* 36(2):224-252.
- 452 Liow, L. H., and N. Stenseth. 2007. The rise and fall of species: implications for macroevolutionary and macroecological studies. *Proc Roy Soc Lond B* 274(1626):2745-2752.



- 454 Mayrose, I., S. H. Zhan, C. J. Rothfels, K. Magnuson-Ford, M. S. Barker, L. H. Rieseberg,  
and S. P. Otto. 2011. Recently formed polyploid plants diversify at lower rates. *Science*  
456 333(6047):1257-1257.
- McShea, D. W. 2004. A Revised Darwinism. *Biol Philos* 19:45-53.
- 458 Orr, H. A. 2009. Fitness and its role in evolutionary genetics. *Nature Reviews Genetics*  
10(8):531-539
- 460 Powell, M. G., and J. MacGregor. 2011. A geographic test of species selection using plank-  
tonic foraminifera during the Cretaceous/Paleogene mass extinction. *Paleobiology* 37(03):426-  
462 437.
- Price, G. R. 1970. Selection and covariance. *Nature* 227:520-21.
- 464 Price, G. R. 1972. Extension of covariance selection mathematics. *Annals of Human Genetics*  
35(4):485-490.
- 466 Raup, D. 1975. Taxonomic Survivorship Curves and Van Valen's Law. *Paleobiology* 1(1):82-  
96.
- 468 Rabosky, D. L., and A. R. McCune. 2010. Reinventing species selection with molecular  
phylogenies. *Trends in Ecology & Evolution* 25(2):68-74.
- 470 Rice, S. H. 2004. *Evolutionary Theory: Mathematical and Conceptual Foundations*. Sinauer  
Associates, Sunderland, Massachusetts U.S.A.
- 472 Simpson, C., and P. G. Harnik. 2009. Assessing the role of abundance in marine bivalve  
extinction over the post-Paleozoic. *Paleobiology* 35(4):631-647.
- 474 Simpson, C. 2010a. The contribution of dispersal ability to the expansion of geographic range.  
2010 Geological Society of America Annual Meeting Abstracts with Programs.
- 476 Simpson, C. 2010. Species selection and driven mechanisms jointly generate a large-scale  
morphological trend in monobathrid crinoids. *Paleobiology* 36(3):481-496.
- 478 Simpson, C. 2011. How many levels are there? How insights from evolutionary transitions  
in individuality help measure the hierarchical complexity of life. Pp. 199-226. In B.  
480 Calcott, and K. Sterelney, eds. *The Major Transitions in Evolution Revisited*. MIT  
Press, Cambridge, Massachusetts.
- 482 Simpson, C. 2012. The evolutionary history of division of labour. *Proceedings of the Royal  
Society B: Biological Sciences* 279(1726):116-121.
- 484 Simpson, C. 2013. Species selection and the macroevolution of coral coloniality and photo-  
symbiosis. *Evolution* 67(6):1607-1621.

- 486 Simpson, C., and J. Miller. 2012. Species selection in the molecular age. Pp. 116-134. In  
J. Miller, and R. Asher, eds. From clone to bone: the synergy of morphological and  
488 molecular tools in paleobiology. Cambridge University Press, New York.
- Simpson, G. G. 1944. Tempo and Mode in Evolution. Columbia University Press, New York.
- 490 Simpson, G. G. 1953. The Major Features Of Evolution. Columbia University Press New  
York.
- 492 Stanley, S. M. 1975. A theory of evolution above the species level. Proceedings of the National  
Academy of Science, USA 72(2):646-650.
- 494 Stanley, S. M. 1979. Macroevolution. W. H. Freeman and Company, San Francisco.
- Van Valen, L. 1973. A new evolutionary law. Evolutionary Theory 1(1):1-30.
- 496 Van Valen, L. 1975. Group Selection, Sex, and Fossils. Evolution 29(1):87-94.
- Vrba, E. S. 1980. Evolution, species and fossils: how does life evolve. South African Journal  
498 of Science 76(2):61-84.
- Vrba, E. S. 1983. Macroevolutionary trends: new perspectives on the roles of adaptation and  
500 incidental effect. Science 221(4608):387-389.
- Vrba, E. S., and S. J. Gould. 1986. The Hierarchical Expansion of Sorting and Selection -  
502 Sorting and Selection Cannot Be Equated. Paleobiology 12(2):217-228.
- Williams, G. C. 1992. Natural selection: Domains, levels and challenges. Oxford University  
504 Press.
